# Supplementary material for: Isolation, Optimization of Fermentation Conditions, and Characterization of an Exopolysaccharide from Pseudoalteromonas agarivorans Hao 2018
Source: MDPI journal article supplement (doi:10.3390/md17120703), 2019-12-13
Supplement: s1 [file s1]

## Supplementary Materials

# Isolation, Optimization of Fermentation Conditions, and Characterization of an Exopolysaccharide from *Pseudoalteromonas agarivorans* Hao 2018

Lujiang Hao <sup>1,2\*†</sup>, Wenlin Liu <sup>1†</sup>, Kai Liu <sup>1</sup>, Kai Shan <sup>1</sup>, Chunlei Wang <sup>1</sup>, Chenxiang Xi <sup>1</sup>, Jianbang Liu <sup>1</sup>, Qiuping Fan <sup>1</sup>, Xiaofei Zhang <sup>1</sup>, Xiaoping Lu <sup>1</sup>, Yanrui Xu <sup>1</sup>, RuiWen Cao <sup>1</sup>, Yaohong Ma <sup>4</sup>, Lan Zheng <sup>4</sup>, Bo Cui <sup>3\*</sup>

<sup>1</sup> State Key Laboratory of Biobased Material and Green Papermaking, Qilu University of Technology (Shandong Academy of Sciences), Jinan 250353, China; wenlin\_liu12@163.com (W.L.); kai\_liu2018@163.com (K.L.); kai\_shan@163.com (K.S.); chunlei\_wang79@163.com (C.W.); ChenXiang\_Xi@163.com (C.X.); liujb19960423@163.com (J.L.); fanqiuping1990@163.com (Q.F.); xiaofei\_305@163.com (X.Z.); 15269213716@163.com (X.L.); 15269211209@163.com (Y.X.); tiangkongxiadebaihe@163.com (R.C.)

<sup>2</sup> Kyiv College at Qilu University of Technology, Jinan 250353, China

<sup>3</sup> School of Food Science and Engineering, Qilu University of Technology (Shandong Academy of Sciences), Jinan 250353, China

<sup>4</sup> Biology Institute, Qilu University of Technology (Shandong Academy of Sciences), Jinan 250103, China; mayaohong@126.com (Y.M.); zhlan8409@163.com (L.Z.)

\* Corresponding Author. Email: lujiang\_hao@qlu.edu.cn; cuibopaper@163.com

† These authors contributed equally to this work

**Figure S1**

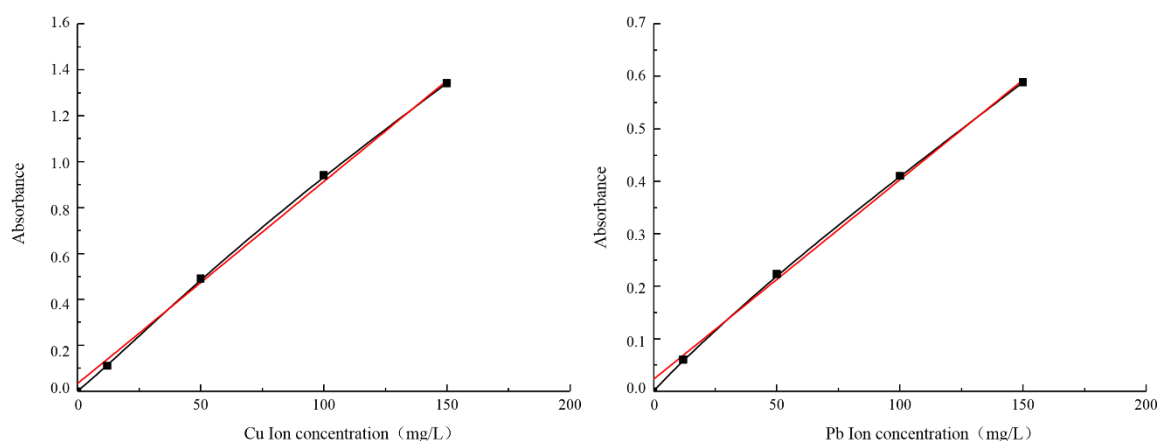

**Figure S1.** The equation of standard curve of  $\text{Cu}^{2+}$  is:  $y=0.0088x+0.0331$ ,  $R^2=0.9904$ , and the degree of fitting was good. The equation of standard curve of  $\text{Pb}^{2+}$  is:  $y=0.0038x+0.0229$ ,  $R^2=0.9907$

**Figure S2**

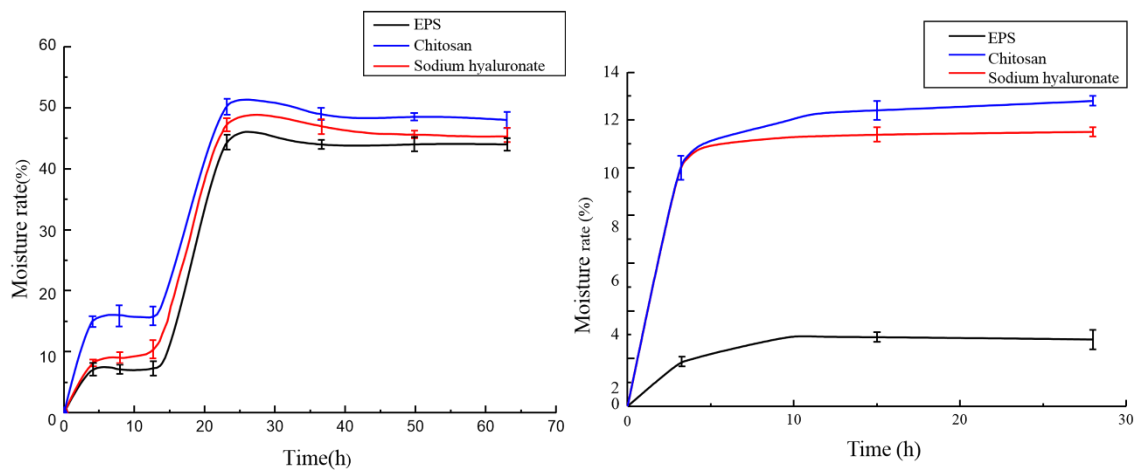

**Figure S2.** The hygroscopicity of chitosan, sodium hyaluronate and EPS was compared by experiments. The hygroscopicity of EPS is significantly higher than that of chitosan, but lower than that of sodium hyaluronate.

**Figure S3**

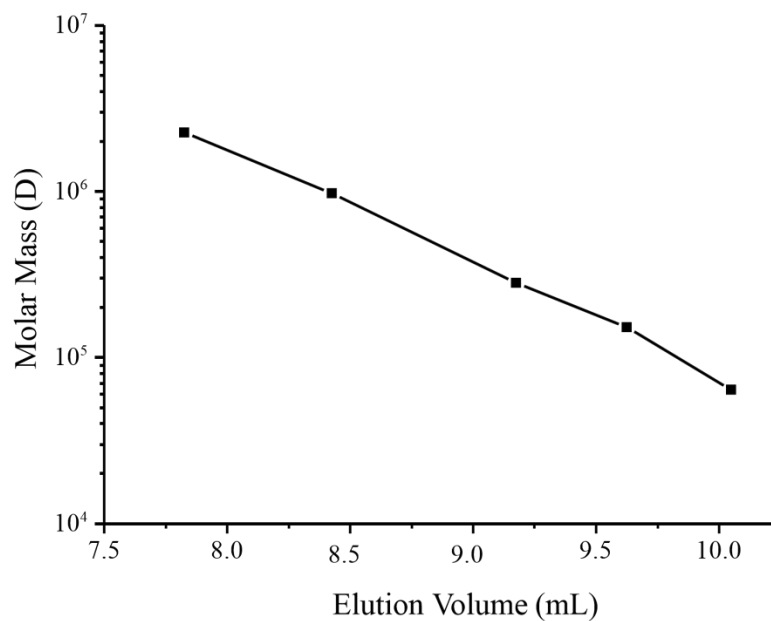

**Figure S3.** 100  $\mu$ L standard sample or EPS sample was added to the liquid chromatograph. Then record the chromatogram. The linear regression equation was corrected using GPC software to obtain a standard curve.
